# Supplementary material for: Moderating role of mental health literacy on the relationship between bullying victimization during the life course and symptoms of anxiety and depression in Chinese college students
Source: Springer Nature journal article supplement (doi:10.1186/s12889-023-16326-y), 2023-07-31
Supplement: 12889_2023_16326_MOESM1_ESM.pdf [file 12889_2023_16326_MOESM1_ESM.pdf]

# Adolescent Mental Health Literacy Assessment Questionnaire

## (AMHLAQ)

(Please select only one answer.)

| Items                                                                                                                                           | Strongly disagree | Disagree | Undecided | Agree | Strongly agree |
|-------------------------------------------------------------------------------------------------------------------------------------------------|-------------------|----------|-----------|-------|----------------|
| 1. Suffering from psychosomatic trauma (e.g. emotional, physical abuse, etc.) may lead to mental illness.                                       |                   |          |           |       |                |
| 2. Traumatic brain injury or brain disease may cause mental illness.                                                                            |                   |          |           |       |                |
| 3. The duration of symptoms of psychophysiological disorders is an important factor in the diagnosis of mental illness.                         |                   |          |           |       |                |
| 4. Psychological consultation is an effective way to treat mental illness.                                                                      |                   |          |           |       |                |
| 5. Increase of communication with others contributes to mental health.                                                                          |                   |          |           |       |                |
| 6. A balanced diet contributes to mental health.                                                                                                |                   |          |           |       |                |
| 7. Loss of interest and happiness is a major symptom of depression.                                                                             |                   |          |           |       |                |
| 8. Anxiety patients often have unexplained worry, excessive nervousness and fear.                                                               |                   |          |           |       |                |
| 9. People with obsessive-compulsive disorder usually have repeated obsessive thoughts or behaviors (e.g. washing hand repeatedly).              |                   |          |           |       |                |
| 10. People with social phobia usually become extremely nervous and anxious when communicating with others or participating in group activities. |                   |          |           |       |                |
| 11. People with post-traumatic stress disorder often try to avoid the situations and content related to trauma.                                 |                   |          |           |       |                |
| 12. If I had a mental disorder, I would feel ashamed.                                                                                           |                   |          |           |       |                |
| 13. If my relatives or friends had mental illness, I would feel ashamed.                                                                        |                   |          |           |       |                |
| 14. If my relatives or friends had mental illness, I wouldn't to help her/him.                                                                  |                   |          |           |       |                |
| 15. I think people with mental disorders(illness) usually come from                                                                             |                   |          |           |       |                |

---

low-income families.

**16. I don't think mental disorders (illness) can affect people's feelings.**

**17. I think only adults can suffer from mental illness.**

**18. I can control my negative emotions and bad behaviors.**

**19. I can solve my current psychological distress.**

**20. If my relatives or friends had mental illness, I would encourage her/him to seek help.**

**21. If my relatives or friends had mental illness, I would give support to her/him.**

**22. If my relatives or friends had mental illness, I would listen to her/him without judging or criticizing.**

---
